# Supplementary material for: Inflammatory Gene Expression Associates with Hepatitis B Virus cccDNA- but Not Integrant-Derived Transcripts in HBeAg Negative Disease
Source: MDPI journal article supplement (doi:10.3390/v14051070), 2022-05-17
Supplement: s1 [file s1]

Supplementary Table S1: Detailed patient information.

| Code | Sex | Age at Biopsy | EASL | ALT † | Staging | Grading | HbsAg §  | HBV_DNA# | pgRNA *  | Liver HBV_DNA* | cccDNA*† | HBs positivity ¶ | HBc Positivity¶ |
|------|-----|---------------|------|-------|---------|---------|----------|----------|----------|----------------|----------|------------------|-----------------|
| 571  | m   | 62            | ENCI | 20    | 0       | 0       |          | 8.50E+02 | 1.36E+04 | 4.82E+04       | 6.40E+01 | 2                | 0               |
| 576  | m   | 40            | ENCH | 40    | 4       | 4       |          | 6.10E+04 | 5.81E+06 | 9.28E+04       | 1.60E+02 |                  |                 |
| 581  | m   | 43            | ENCH | 40.8  | 5       | 3       | 51.00    | 5.50E+03 | 8.77E+02 | 1.09E+05       |          | 1                | 0               |
| 582  | f   | 77            | ENCI | 20    | 0       | 0       | 1200.00  | 6.94E+03 | 6.40E+03 | 4.10E+04       |          | 2                | 0               |
| 584  | m   | 49            | ENCI | 32    | 1       | 1       | 0.10     | 4.90E+01 | 1.49E+02 | 4.22E+04       |          | 0                | 0               |
| 586  | m   | 63            | ENCH | 90    | 3       | 5       |          | 1.10E+08 | 3.35E+07 | 5.84E+06       | 1.08E+03 |                  |                 |
| 590  | m   | 60            | ENCH | 136   | 6       | 7       | 1800.00  | 9.00E+00 | 7.11E+06 | 4.80E+06       | 1.57E+03 | 1                | 3               |
| 591  | m   | 86            | ENCI | 32    | 1       | 2       | 0.13     | 2.80E+02 | 1.43E+02 | 1.44E+04       | 2.42E+01 | 0                | 0               |
| 1603 | m   | 50            | ENCH | 123   | 5       | 7       |          | 5.30E+06 | 8.35E+08 | 1.35E+05       | 4.00E+02 |                  |                 |
| 1604 | f   | 58            | ENCH | 80    | 5       | 5       | 2600.00  | 4.77E+05 | 6.15E+04 | 6.06E+04       | 3.69E+01 | 1                | 2               |
| 1608 | f   | 62            | ENCH | 60    | 6       | 3       | 69.00    | 2.00E+02 | 3.11E+04 | 1.66E+04       |          | 0                | 0               |
| 1613 | m   | 35            | ENCH | 40    | 4       | 4       | 4700.00  | 8.00E+00 | 2.84E+04 | 3.75E+04       |          | 2                | 0               |
| 1615 | f   | 67            | ENCH | 160   | 2       | 2       | 1000.00  | 6.50E+03 | 1.17E+04 | 3.94E+04       |          | 2                | 0               |
| 1618 | f   | 63            | ENCH | 60    | 3       | 2       | 860.00   | 1.60E+05 | 1.27E+05 | 3.28E+04       | 5.95E+01 | 3                | 1               |
| 1627 | f   | 52            | ENCI | 44    | 1       | 0       | 220.00   | 3.70E+02 | 2.04E+04 | 1.42E+03       | 1.60E+02 | 2                | 0               |
| 1629 | m   | 50            | ENCH | 40    | 3       | 2       | 19000.00 | 1.50E+01 | 1.04E+03 | 3.90E+04       |          | 1                | 0               |
| 1643 | m   | 59            | ENCI | 33    | 1       | 1       | 1900.00  | 3.40E+02 | 1.38E+05 | 1.48E+04       |          |                  |                 |
| 1654 | m   | 53            | ENCI | 40    | 2       | 1       |          | 5.22E+03 | 4.97E+03 | 3.26E+03       | 2.62E+01 | 0                | 0               |
| 1661 | m   | 52            | ENCH | 40    | 2       | 2       |          | 1.35E+06 | 8.09E+03 | 7.42E+04       |          | 1                | 0               |
| 1663 | m   | 44            | ENCH | 160   | 5       | 3       | 8400.00  | 4.00E+03 | 1.08E+05 | 1.68E+05       | 2.32E+02 | 2                | 2               |
| 1669 | m   | 38            | ENCH | 48    | 1       | 1       | 2100.00  | 8.30E+03 | 3.63E+04 | 2.35E+04       |          | 2                | 0               |
| 1673 | m   | 54            | ENCI | 40    | 1       | 1       | 604.00   | 1.60E+03 | 4.11E+03 | 1.80E+04       |          | 2                | 0               |
| 1677 | f   | 36            | ENCH | 32    | 2       | 0       | 3500.00  | 1.50E+04 | 4.00E+01 | 3.04E+04       | 1.69E+01 | 0                | 0               |
| 1685 | m   | 70            | ENCI | 22    | 2       | 1       |          | 5.20E+02 | 1.28E+04 | 9.37E+03       |          | 1                | 0               |
| 1710 | m   | 50            | ENCI | 32    | 1       | 3       | 840.00   | 1.89E+03 | 4.38E+03 | 1.38E+04       |          | 1                | 0               |
| 1724 | f   | 52            | ENCH | 71    | 3       | 6       | 230.00   | 2.02E+02 | 8.40E+04 | 7.92E+03       | 1.64E+01 | 1                | 0               |

§: HbsAg is measured as IU/ml. Only available for 19 samples.

\*: Expressed as normalised copies/µg

†: Only detectable in 13 samples

‡: ALT are expressed as IU/L

#: HBV DNA is measured as IU/mL

¶: HBs/c scores are calculated as % of positive cells: 0= neg, 1<33%, 33%<2<66%, 3>66%

**A**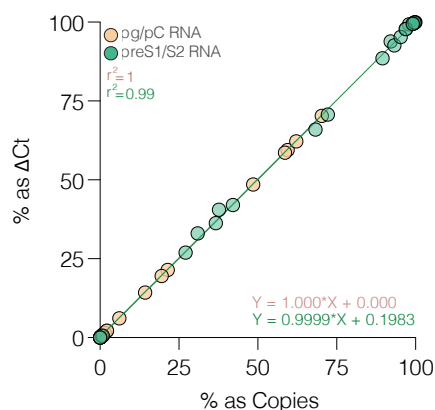**B**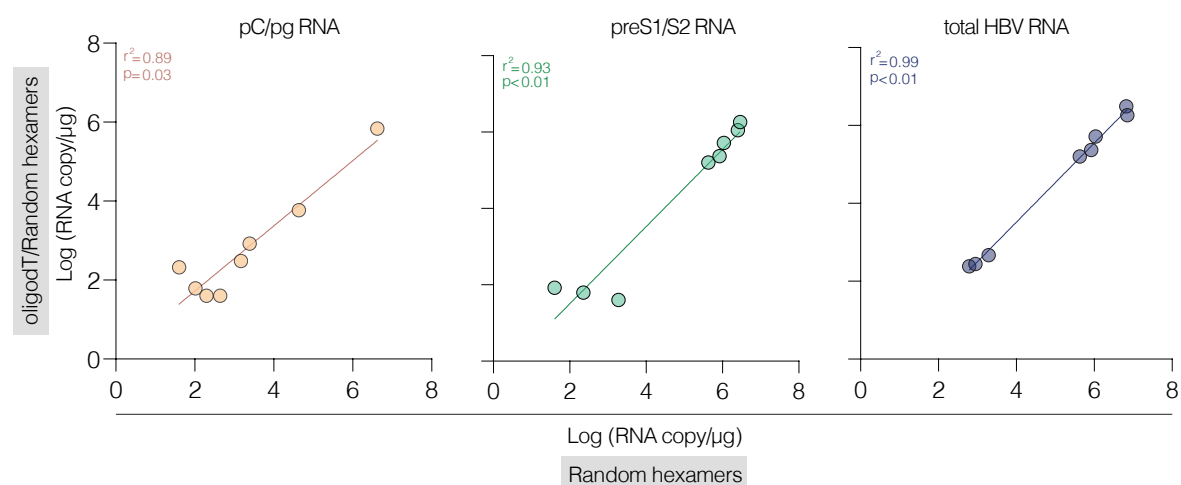

Supplementary Figure S1: (A) Correlation between Delta Ct and Copy number estimation for HBV pC/pg and preS1/S2 RNAs. pC/pg and preS1/S2 RNA copies in the biopsy samples were inferred using the Delta Ct method or copy number and relative abundance compared by Spearman correlation. (B) Correlations between copy number estimations for HBV pC/pg, preS1/S2 and total RNAs obtained with oligo-dT and/or random hexamers- based RT approach. Total HBV RNA primers were designed to target a conserved region in the 3' terminus of all transcripts (1521-1596 relative to the EcoRI site).

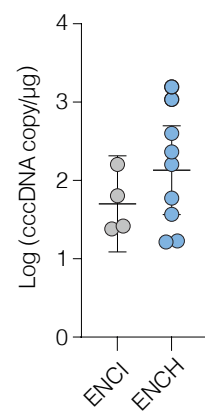

Supplementary Figure S2. cccDNA copies in biopsies from ENCI and ENCH.

|      |                     |
|------|---------------------|
| 571  | GATTAGGTTAAAGGTCCTT |
| 576  | GMTTAGATTAAAGRTCTT  |
| 581  | GATTAGGTTAAAGGTCCTT |
| 582  | GATTAGATTAAAGGTCCTT |
| 584  | GATTAGGTTAAAGGTCCTT |
| 586  | GCTTAGATTAAAGATCTT  |
| 590  | GACTAGATTAAATGATCTT |
| 591  | GATTAGGTTAAAGGTCCTT |
| 1603 | GCTTAGATTAAAGATCTT  |
| 1604 | - - - - - CTTT      |
| 1608 | - - - - -           |
| 1613 | GATTAGATTAAAGTTGTTT |
| 1615 | GACTAGGTTAAAGGTCCTT |
| 1618 | GACTAGATTACTGATCTT  |
| 1627 | GMTTAGATTAAAGATCTT  |
| 1629 | GATTAGGTTAAAGGTCCTT |
| 1643 | GATTAGGTTAAAGGTCCTT |
| 1654 | GATKAGGTTAAAGGTCCTT |
| 1661 | GCTTAGATTAAAGATCTT  |
| 1663 | GAYTAGATTAAAGRTCTT  |
| 1669 | GATTAGATTAAAGGTCCTT |
| 1673 | GCTTAGATTAAWGRCTCTT |
| 1677 | GACTAGGTTAATGATTTT  |
| 1685 | GATTAGGTTAAAGGTCCTT |
| 1710 | GATTAGGTTAAAGGTCCTT |
| 1724 | GATTAGGTTAAAGGTCCTT |

|      |
|------|
| 1751 |
| 1752 |
| 1753 |
| 1754 |
| 1755 |
| 1756 |
| 1757 |
| 1758 |
| 1759 |
| 1760 |
| 1761 |
| 1762 |
| 1763 |
| 1764 |
| 1765 |
| 1766 |
| 1767 |
| 1768 |
| 1769 |

Supplementary Figure S3: BCP sequences. The BCP region (600bp) was PCR amplified from RNA isolated from all patient biopsies and Sanger sequenced in both directions. Consensus sequences were generated with a conservation threshold of 90%.

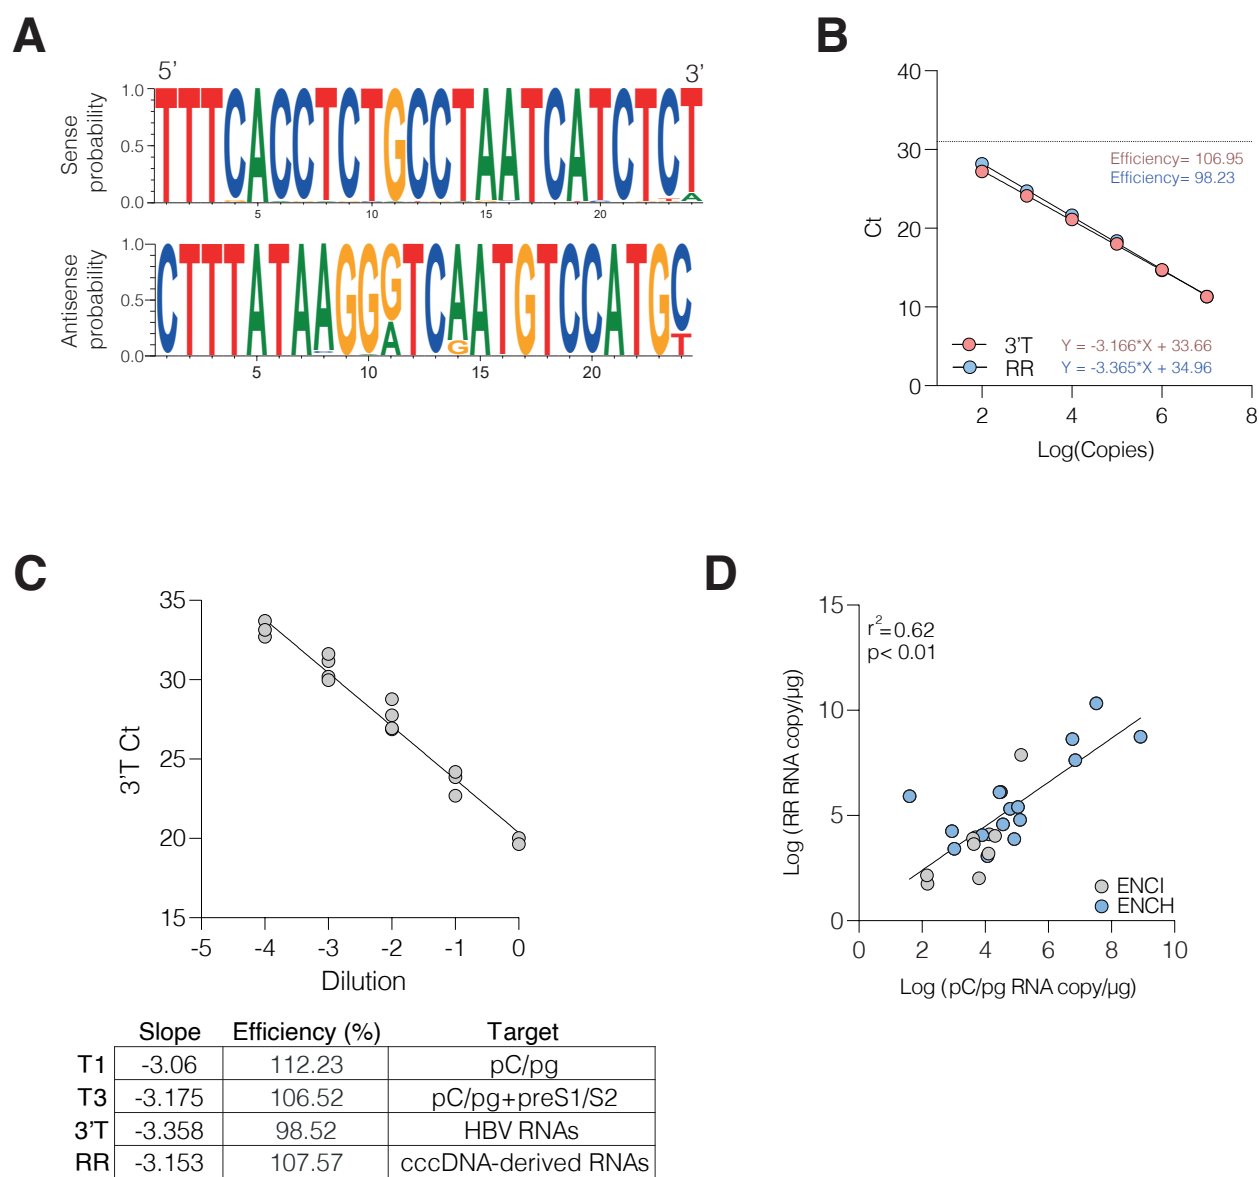

Supplementary Figure S4: Characterization of RR primers. Sense and anti-sense conservation on 1202 genotype D deposited sequences (hbvdb.lyon.inserm.fr/HBVdb) (A). RR and 3'T amplification efficiency on a HBV1.0 plasmid with 10-fold serial dilutions of known copy numbers (B). cDNA from 4 different biopsies was amplified using 10-fold serial dilutions to calculate slope and qPCR efficiency for each primer pairs and a representative plot with 3'T primer is shown. (C). Correlation between pg/pC RNA copies and cccDNA-derived transcripts in patients according to ENCI (grey) or ENCH (blue) grouping (D).

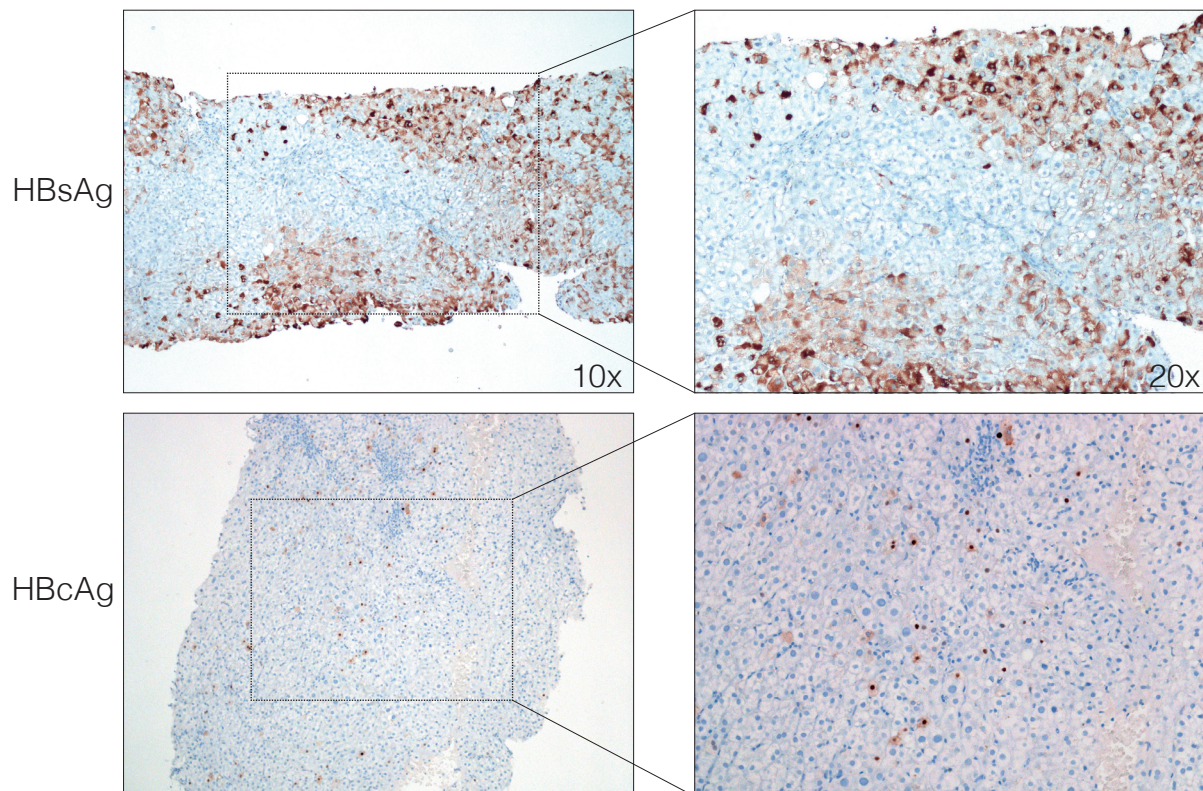

Supplementary Figure S5: HBsAg and HBcAg staining patterns in liver biopsies. HBsAg and HBcAg staining of sequential sections of a representative patient shown at 10 and 20x magnification.

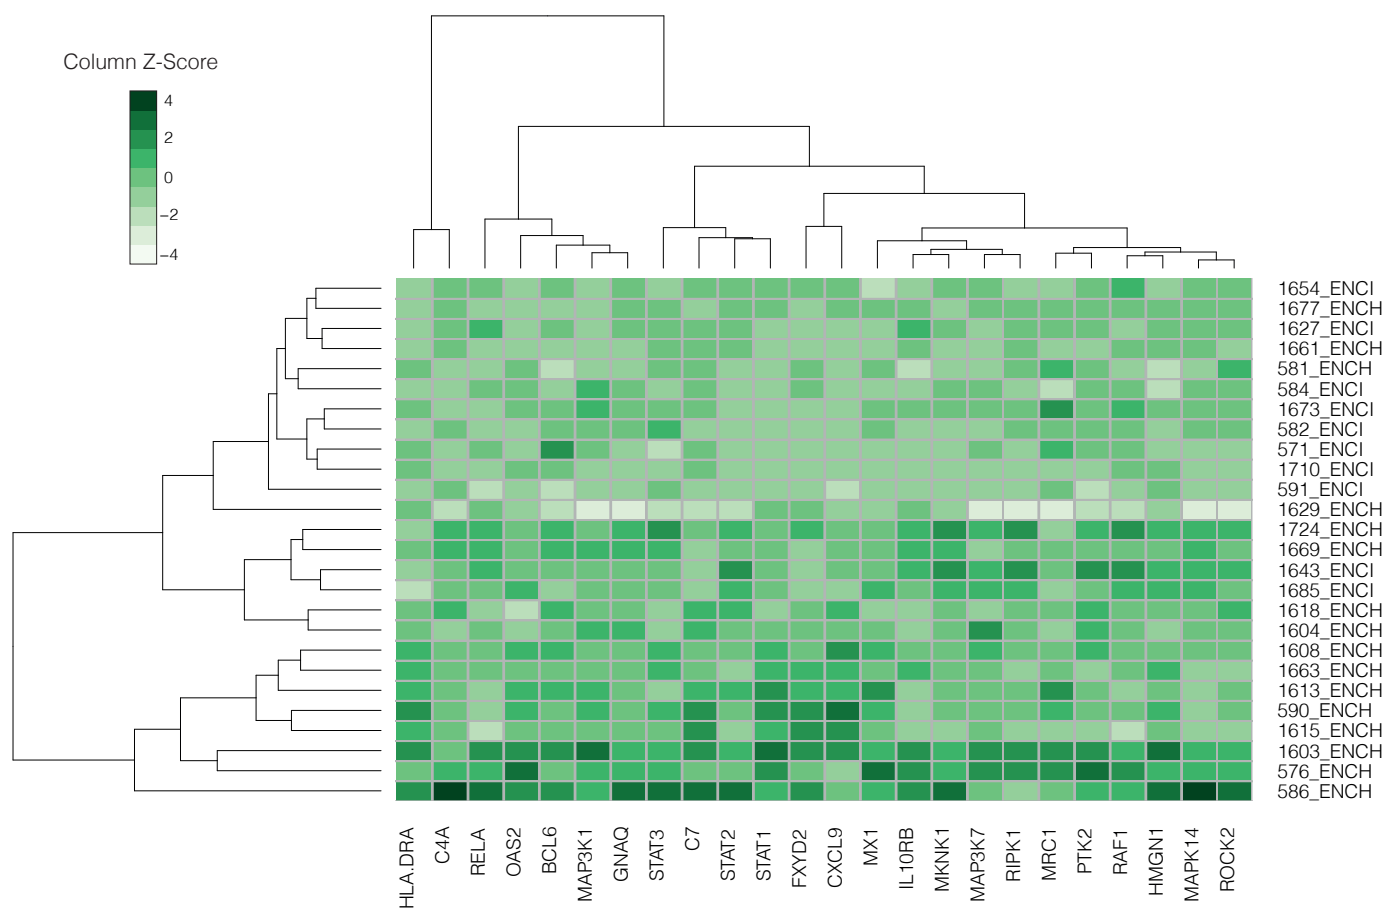

Supplementary Figure S6: Cluster analysis of 24 gene set stratifies patients according to ENCI or ENCH grouping.

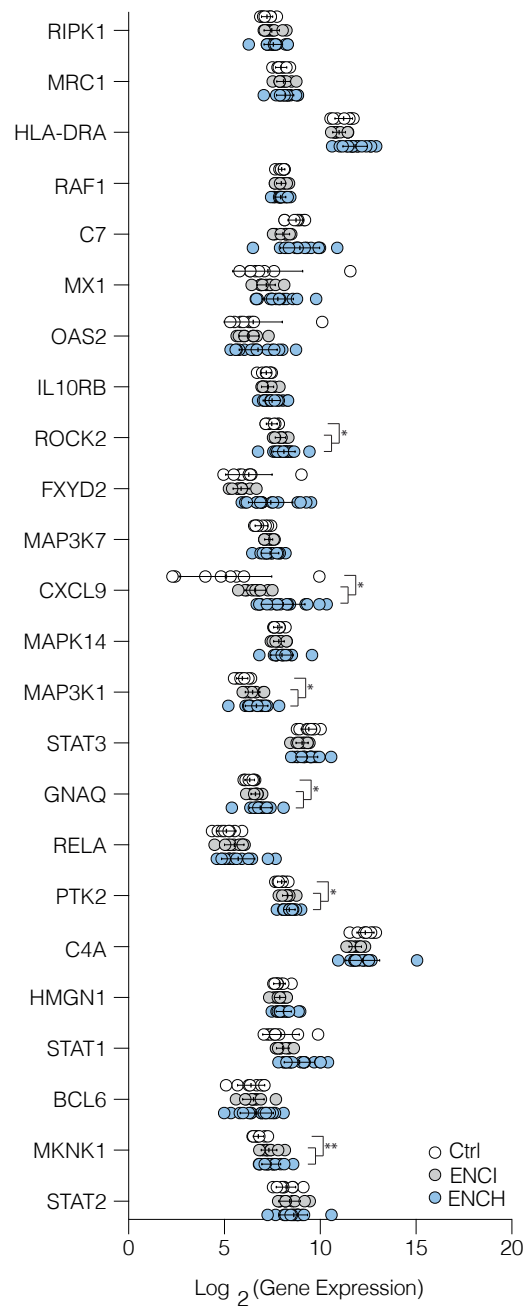

Supplementary Figure S7: Expression of the 24 inflammatory gene signature. Log<sub>2</sub>-transformed normalized counts shown for non-viral controls, ENCI and ENCH. Mann-Whitney U test between Ctrl and CHB, with Holm-Sidak pvalue correction.
